1 DENSITY DEPENDENCE IN DEMOGRAPHY AND DISPERSAL GENERATES  
2 FLUCTUATING INVASION SPEEDS

3 Lauren L. Sullivan<sup>a,1</sup>, Bingtuan Li<sup>b</sup>, Tom E. X. Miller<sup>c</sup>, Michael G. Neubert<sup>d</sup>,  
4 Allison K. Shaw<sup>a,1</sup>

5 <sup>a</sup>Department of Ecology, Evolution and Behavior, University of Minnesota, Saint  
6 Paul, MN 55108; <sup>b</sup>Department of Mathematics, University of Louisville, Louisville,  
7 KY 40292; <sup>c</sup>Department of Ecology and Evolutionary Biology, Rice University,  
8 Houston, TX 77005; <sup>d</sup>Biology Department, Woods Hole Oceanographic Institution,  
9 Woods Hole, MA 02543

10 Author Contributions: T.E.X.M., M.G.N., and A.K.S. designed initial research;  
11 L.L.S. and M.G.N. led simulations; L.L.S. led writing; All authors contributed to  
12 ideas development and writing.

13 <sup>1</sup>To whom correspondence should be addressed. Email: lsulliva@umn.edu, or  
14 ashaw@umn.edu

15 Keywords: Allee effects | density-dependent dispersal | integrodifference equations |  
16 invasive species

## 17 **Abstract**

18 Density dependence plays an important role in population regulation and is known  
19 to generate temporal fluctuations in population density. However, the ways in which  
20 density dependence affects spatial population processes, such as species invasions, are  
21 less understood. While classical ecological theory suggests that invasions should ad-  
22 vance at a constant speed, empirical work is illuminating the highly variable nature of  
23 biological invasions, which often exhibit non-constant spreading speeds even in simple,  
24 controlled settings. Here, we explore endogenous density dependence as a mechanism  
25 for inducing variability in biological invasions with a set of population models that  
26 incorporate density dependence in demographic and dispersal parameters. We show  
27 that density dependence in demography at low population densities—i.e., an Allee  
28 effect—combined with spatiotemporal variability in population density behind the  
29 invasion front can produce fluctuations in spreading speed. The density fluctuations  
30 behind the front can arise from either overcompensatory population growth or from  
31 density-dependent dispersal, both of which are common in nature. Our results demon-  
32 strate that simple rules can generate complex spread dynamics, and highlight a novel  
33 source of variability in biological invasions that may aid in ecological forecasting.

## 34 **Introduction**

35 Fluctuations in population size have long fascinated ecologists and fueled a now-classic  
36 debate over whether populations are governed by extrinsic environmental factors or  
37 by intrinsic self-limitation (15). One of the most important advances of twentieth-  
38 century ecology was the discovery that intrinsic density feedbacks can cause popula-  
39 tion densities to fluctuate, even in constant environments (26; 5; 48). This discovery  
40 helped resolve the important role of density dependence in population regulation,  
41 revealing that strong regulating forces can generate dynamics superficially consistent

42 with no regulation at all. Our understanding of temporal fluctuations in population  
43 size stands in sharp contrast with our relatively poor understanding of fluctuations  
44 in the spatial dimension of population growth: spread across landscapes.

45 Understanding the dynamics of population spread takes on urgency in the current  
46 era of human-mediated biological invasions and range shifts in response to climate  
47 change. The velocity of spread, or “invasion speed”, is a key summary statistic of an  
48 expanding population and an important tool for ecological forecasting (8). Estimates  
49 of invasion speed are often derived from regression methods that describe change  
50 in spatial extent with respect to time (30; 1; 49). Implicit in this approach is the  
51 assumption that the true spreading speed is constant and deviations from it represent  
52 “error” in the underlying process, or in human observation of the process. This  
53 assumption is reinforced by long-standing theoretical predictions that, under a wide  
54 range of conditions, a population will asymptotically spread with a constant velocity.  
55 Invasion at a constant speed can arise from both *pulled* waves (where the advancing  
56 wave moves forward by dispersal and rapid growth of low-density populations far  
57 in front of the advancing wave (56; 44; 16; 32)), as well as *pushed* waves (where the  
58 invasion is driven by reproduction and dispersal from high-density populations behind  
59 the invasion front (21; 55; 50)). The conventional wisdom of a long-term constant  
60 invasion speed is widely applied (53; 9).

61 In contrast to classic approaches that emphasize a long-term constant speed, there  
62 is growing empirical recognition that invasion dynamics can be highly variable and  
63 idiosyncratic (27; 29; 34; 59; 60; 4; 54; 14). There are several theoretical explanations  
64 for fluctuations in invasion speed (which we define here as any persistent tempo-  
65 ral variability in spreading speed), including stochasticity in either demography or  
66 dispersal (35; 54; 17; 42; 14), and temporal or spatial environmental heterogeneity  
67 (43; 33; 57; 58; 3; 40). Indeed, empirical studies often attribute temporal variation  
68 in speed to differences in the environments encountered by the invading population

69 (e.g., (1; 37)). Predator-prey dynamics can also induce fluctuating invasion speeds  
70 (33; 7). Notably, Dwyer and Morris (7) showed that density feedbacks can produce  
71 fluctuations in spreading speed, yet we still have an incomplete understanding of the  
72 conditions under which fluctuations in speed arise. Surprisingly few theoretical stud-  
73 ies have since investigated these density feedbacks, especially with respect to their  
74 effect on endogenously-driven speed fluctuations, despite recent empirical work on  
75 invasion variability (34; 59; 53; 60).

76 Here, we develop deterministic, single-species mathematical models of spatial  
77 spread to ask under what conditions the invasion speed of an expanding popula-  
78 tion can fluctuate in a spatially uniform and temporally constant environment. As  
79 a starting point, we took inspiration from the relatively complete understanding of  
80 fluctuations in population size generated by density dependence in nonspatial mod-  
81 els (48). We conjectured that density-dependent feedbacks might similarly generate  
82 fluctuating invasion speeds pursuing the suggestion first made in (7). Because spread  
83 dynamics are jointly governed by demography (local births and deaths) and dispersal  
84 (spatial redistribution), we considered several types of density feedbacks (39), in-  
85 cluding positive density dependence in population growth (i.e., Allee effects) at the  
86 low-density invasion front (47), and density-dependent movement (25; 7).

87 Our analysis uncovered novel density-dependent mechanisms that can induce vari-  
88 ability in invasion speed, with fluctuations ranging from stable two-point cycles to  
89 more complicated aperiodic dynamics. By demonstrating that simple invasion mod-  
90 els can generate complex spread dynamics, our results reveal previously undescribed  
91 sources of variability in biological invasions and provide a roadmap for empirical  
92 studies to detect these processes in nature.

## 93 **Models and Results**

94 We use integrodifference equations (16) to model population growth and spread.  
95 These models describe the change in population density ( $n_t(x)$ ) from time  $t$  to time  
96  $t + 1$  as the result of demography and dispersal. First, individuals at location  $y$  gen-  
97 erate  $f(n_t(y))$  offspring and then die. Next, a fraction  $p$  of these offspring disperse.  
98 The probability that a dispersing individual moves from location  $y$  to location  $x$  is  
99 given by the dispersal kernel,  $k(x - y)$ . The remaining fraction  $(1 - p)$  remain at their  
100 natal location. Concatenating reproduction and dispersal, we have (51; 52; 22; 23):

$$n_{t+1}(x) = (1 - p)f(n_t(x)) + \int_{-\infty}^{\infty} p k(x - y) f(n_t(y)) dy. \quad (1)$$

101 We will assume that  $f(1) = 1$ , so that the population has an equilibrium at the  
102 carrying capacity  $n_t(x) = 1$ , and that the tails of the dispersal kernel  $k$  are thin  
103 (i.e., go to zero at least exponentially fast), so that the probability that an individual  
104 disperses an extremely large distance is exceedingly small.

105 In general, both the dispersing fraction  $p$  and the dispersal kernel  $k$  may depend  
106 on the population density at the natal location, as does the reproduction function  
107  $f$ . The way that the functions  $f$ ,  $p$ , and  $k$  depend on population density determine  
108 the dynamics of Eq. 1. In the simplest case, the reproduction function  $f$  is strictly  
109 compensatory; that is,  $f$  is an increasing but decelerating function of density ( $f'(n) >$   
110  $0$  and  $f''(n) < 0$ ). For strictly compensatory models, the population will spread at a  
111 constant asymptotic speed (Fig. 1a) if three conditions hold: small populations grow  
112 ( $f'(0) > 1$ ), all individuals disperse ( $p = 1$ ), and dispersal distance is independent of  
113 population density. Here, the speed is determined by the growth and spread of the  
114 low-density populations far ahead of the main invasion front (56); the dynamics at  
115 high densities do not matter – the hallmark of a pulled invasion.

116 Constant asymptotic invasion speeds are not, however, limited to the simple case

117 just described. In the absence of Allee effects, they can also occur if the reproduction  
118 function produces overcompensation—declining offspring production with increasing  
119 population density (so that  $f'(1) < 0$ ). As with classic non-spatial models, over-  
120 compensation produces oscillations in population density (26; 5; 48), which in turn  
121 cause dynamic changes in the shape of the wave behind the invasion front. Despite  
122 these complex fluctuations at high population densities, the invasion speeds of over-  
123 compensatory models (without Allee effects) remain constant (Fig. 1b), and are still  
124 determined by the dynamics at low densities (19).

125 Long-standing theory suggests that invaders subject to Allee effects at low pop-  
126 ulation density and compensatory dynamics at larger population density, will also  
127 eventually spread at a constant speed if their initial population sizes are sufficiently  
128 large and the Allee effect is not too strong (55; 21). Allee effects cause invasion waves  
129 to be pushed from behind their leading edge (16; 55). When Allee effects are suffi-  
130 ciently strong, the invasion speed no longer depends upon the pull of populations at  
131 low densities in front of the wave, but rather on the strength of the push from the  
132 high density populations behind it. In our models, we show that when low-density  
133 Allee effects combine with spatiotemporal population density fluctuations (created  
134 through overcompensation or density-dependent dispersal), the invasion speed may  
135 not be constant asymptotically, as expected under classic invasion theory, but may  
136 rather exhibit persistent fluctuations (Fig. 1c-f).

### 137 **Allee effects and overcompensation**

138 First, we investigated whether combining an Allee effect with overcompensation at  
139 high population density could induce fluctuating invasion speeds when dispersal is  
140 density-independent and all offspring disperse (i.e.,  $p = 1$ ). This model (the ‘over-  
141 compensatory model’, see Materials and Methods, Fig. S1a) has two important pa-  
142 rameters:  $r$ , which affects both the growth rate at low density and the strength of  
143 density dependence at carrying capacity, and  $a$ , the Allee threshold. We assume that

144 when the population density falls below  $a$ , no offspring are produced there (a strong  
145 Allee effect). If the population density falls below  $a$  everywhere, the population is  
146 doomed to extinction.

147 Simulations (described in Materials and Methods) revealed this model generates  
148 variable-speed invasions (Fig. 1c), but only when the low-density Allee threshold is  
149 of intermediate value and high-density overcompensation is strong ( $r > 2$ , Fig. 2a).  
150 For  $r > 2$ , the local equilibrium density  $n_t(x) = 1$  is unstable, leading to sustained  
151 fluctuations in local density. Our simulations suggest  $r > 2$  is a necessary condition for  
152 fluctuating invasion speeds in the overcompensatory model. If the Allee threshold ( $a$ )  
153 is too large, the spreading population eventually falls below the threshold everywhere  
154 and is extirpated. If  $a$  is sufficiently small, the invasion proceeds with an apparently  
155 constant speed (Fig. 2a).

156 These fluctuations are induced by the combination of a strong Allee effect, which  
157 produces a pushed wave, and strong overcompensation, which produces large spa-  
158 tiotemporal variation in density behind the invasion front and thus variation in the  
159 strength of the push (Fig. 3). When the population density at any location is smaller  
160 than the Allee threshold ( $a$ ), as at the leading edge of the wave, the population  
161 vanishes before the next time step. Populations just above  $a$  become large after re-  
162 production, but as the population size increases beyond  $a$ , the offspring population  
163 size  $f(n(x))$  declines as a result of overcompensation (Fig. S1a). Therefore, when  
164 reproduction occurs (transition between  $n(x)$  and  $f(n(x))$ , Fig. 3 black vs blue), pop-  
165 ulations with the highest density become populations of low density, and populations  
166 with density just above  $a$  become high density. Through time, this creates variability  
167 in the size of the push by varying the size of the region contributing to the wave  
168 front, leading to fluctuating invasion speeds (Fig. 3d, S3a-f). The speed fluctuations  
169 can be periodic or more complex (Fig. S2). They vary in amplitude by as much as  
170 100% of the mean speed, with some parameter combinations reaching amplitudes of

171  $\sim 400\%$  of the mean speed (Fig. 2a).

172 This mechanism for variable-speed invasion does not depend on the discreteness  
173 of time. We developed a continuous-time version of the overcompensatory model,  
174 where we find fluctuating invasion speeds as long as density fluctuations behind the  
175 wave front combine with strong low-density Allee effects (SI Appendix, Fig. S4-6).

## 176 **Allee effects and density-dependent dispersal**

177 Overcompensation is not the only mechanism that can generate the spatiotemporal  
178 variability in population density that is necessary to produce fluctuating invasion  
179 speeds when combined with Allee effects. Density-dependent dispersal, manifest as  
180 either density-dependence in the propensity to disperse ( $p$ ) or in the shape of the  
181 dispersal-kernel ( $k$ ), can generate this high-density variability in the pushing force  
182 as well. We demonstrate this result with two models (the 'propensity model' and  
183 the 'distance model', respectively, see Materials and Methods), both built upon a  
184 piecewise linear growth function that is compensatory at high population density  
185 (Fig. S1b). We continue to include low-density Allee effects. When the population  
186 size falls below the threshold density  $a$ , individuals produce offspring at the constant  
187 per capita rate  $\lambda$ . Alternatively, if the population size exceeds  $a$ , the population goes  
188 to carrying capacity.

189 In the propensity model, population density influences the propensity to disperse  
190 ( $p$ ). In particular, we assume that the proportion of offspring that disperse is given  
191 by a logistic function of local population density ( $n_t(x)$ ) (Eq. 5) with four parameters:  
192 the minimum ( $p_0$ ) and maximum ( $p_{\max}$ ) dispersal proportion; a location parameter  
193  $\hat{n}$ , which is the density at which the dispersal propensity is halfway between  $p_0$  and  
194  $p_{\max}$ ; and a shape parameter  $\alpha$ . The sign of  $\alpha$  determines if the proportion dispersing  
195 increases ( $\alpha > 0$ ) or decreases ( $\alpha < 0$ ) with density (Fig. S1c). The larger the  
196 magnitude of  $\alpha$  the steeper the density response, which is centered around  $\hat{n}$ .

197 The propensity model can also generate invasions that spread at fluctuating speeds



198 (Fig. 1d, S7). We found these fluctuations persist only when Allee effects are strong  
199 ( $0 \leq \lambda < 1$ ), dispersal propensity increases with population density ( $\alpha > 0$ ), and  
200 the dispersal response occurs at a population density that is larger than the Allee  
201 threshold ( $\hat{n} > a$ ). Fluctuations in speed are nearly always periodic (Fig. S7c, S8a-  
202 d) and of large amplitude, altering the invasion speed by  $\sim 100\% - 750\%$  relative to  
203 the mean speed (Fig. 2b). These large-amplitude periodic fluctuations often include  
204 positive and negative speeds, meaning that invasions alternate between steps forward  
205 and smaller steps backward (Fig. 1d).

206 As before, spreading speed fluctuations are created through variations in the dis-  
207 persing population that pushes the invasion forward from behind the front (Fig. 1d).  
208 The magnitude of the push depends on the width of the region contributing dispersing  
209 individuals, and the proximity of this region to the front (Fig. S3g-l). When density  
210 dependence in dispersal is strong and positive (large  $\alpha$ ), the population directly ad-  
211 jacent to the front is below the Allee effect threshold ( $a$ ) and therefore decays to zero  
212 (Fig. S3g-h). Farther behind the front, density is above  $a$ , but below the dispersal  
213 midpoint ( $\hat{n}$ ), thus this region of the population reproduces but does not disperse  
214 (Fig. S3h-i). This action results in a large push from behind the wave front that  
215 moves the invasion forward at the next time step when the non-dispersing popula-  
216 tion eventually disperses (Fig. S3i-k). Subsequently, the region of the non-dispersing  
217 population is much smaller and farther from the invasion front at the next time step,  
218 resulting in a much smaller push (Fig. S3k).

219 With the distance model we explore a second type of density-dependent dispersal,  
220 where density alters the dispersal distance. Here, all offspring disperse ( $p = 1$ ), but  
221 density alters the variance ( $\sigma^2$ ) of the dispersal kernel (Eq. 6). Four parameters  
222 control this dependence:  $\sigma_0^2$  and  $\sigma_{\max}^2$ , which are the lower and upper bounds of the  
223 variance; the location parameter,  $\hat{n}$  which is the density at which dispersal variance  
224 is halfway between  $\sigma_0^2$  and  $\sigma_{\max}^2$ ; and a shape parameter  $\beta$ . The dispersal variance

225 increases with population density when  $\beta$  is positive, and decreases with density when  
226  $\beta$  is negative. The larger the absolute value of  $\beta$ , the sharper the response (Fig S1d).

227 The distance model also produces the necessary spatiotemporal variability in  
228 population density behind the invasion front to induce fluctuating invasion speeds  
229 (Fig. 1e,f, S7). As in the propensity model, the invasion speed only fluctuates when  
230 Allee effects are strong ( $0 \leq \lambda \leq 1$ ). However, unlike the propensity model, we find  
231 persistent fluctuations are possible when density-dependent dispersal is both positive  
232 ( $\beta > 0$ ) and negative ( $\beta < 0$ ) (Fig. 2c). The speed fluctuations are more frequently  
233 aperiodic (Fig. S8e-h) than the two-cycle fluctuations seen in the propensity model,  
234 with largest amplitude when dispersal distance increases with density ( $\beta > 0$ ) (Fig. 2c,  
235 S7f). In general, fluctuations are larger as both Allee effects and density-dependent  
236 dispersal are stronger, and alter the invasion speed by  $\sim 5\% - 100\%$  ( $\beta > 0$ ), and  
237  $\sim 1\% - 9\%$  ( $\beta < 0$ ) relative to the mean speed (Fig. 2c, S7f).

238 When the dispersal distance exhibits strong positive density dependence (Fig. S3m-  
239 r), populations at densities above the dispersal threshold disperse long distances, and  
240 those below disperse short distances. In this model, each push forward is made up  
241 of a combination of both short and long distance dispersers. The size of this push  
242 changes depending on the proportion of the push made up of each type of disperser,  
243 which is temporally variable, creating fluctuating invasion speeds. A similar mech-  
244 anism operates when  $\beta < 0$  (Fig. S3s-x), however instead high density populations  
245 disperse short distances and vice versa.

## 246 Discussion

247 Our work provides novel insight into mechanisms behind invasion variability: fluctu-  
248 ations in invasion speed can occur solely due to endogenous density dependence.  
249 In the models we examine, both a strong low-density Allee effect (creating a pushed  
250 wave (9; 28)), and large variations in population density behind the invasion front

251 are necessary to create fluctuating invasion speeds. We demonstrate that the neces-  
252 sary spatiotemporal variability can be generated via two types of density feedbacks:  
253 overcompensatory density dependence, or density-dependent dispersal. When com-  
254 bined with Allee effects, either of these factors can cause the strength of the invasion  
255 push from high density populations to vary, leading to varying spreading speeds.  
256 The potential for deterministic, density-dependent processes to generate complex  
257 fluctuations in local population density is a canonical result of theoretical popula-  
258 tion biology (15; 26; 5; 48) and has proven influential in basic and applied empirical  
259 settings (36). By considering the spatial dimension of population growth, which is  
260 increasingly relevant in the context of global change, our new results flesh out under-  
261 standing of complex population dynamics arising from endogenous mechanisms. We  
262 conjecture that there is some generality to this mechanism as we also see fluctuating  
263 speeds in continuous time (SI Appendix, Fig. S4), although we recognize fluctuations  
264 can occur through other means (e.g. (7; 33; 14)). Our results are potentially con-  
265 sistent with the highly variable spreading speeds seen in empirical invasion studies  
266 (14; 34; 59; 54; 4; 60).

267 Processes capable of generating fluctuations in population density that create the  
268 variable pushing force behind the invasion vanguard are common in nature. First,  
269 many invasive species show the combination of high intrinsic growth rates and con-  
270 specific interference at high density that gives rise to overcompensatory population  
271 fluctuations (36; 61). Second, density dependent dispersal as a distinct source of  
272 spatiotemporal density fluctuations can arise even with strictly compensatory den-  
273 sity dependence in population growth. We found fluctuating invasion speeds with  
274 positive density-dependent dispersal propensity, which is common in organisms with  
275 environmentally inducible dispersal polymorphisms, including many insects. For ex-  
276 ample, wingless aphids (11; 13) and planthoppers (38) can produce winged morphs  
277 when densities become high. When density dependence alters dispersal distance,

278 fluctuations in speed were seen under both positive and negative density dependence.  
279 Mobile organisms can increase their dispersal distance with increasing density by al-  
280 tering behavioral responses (25). Alternatively, dispersal distances can decrease with  
281 density when crowding decreases reproductive and dispersal ability (24; 6; 25), or in  
282 animals (notably small mammals) with strong group behavior (12; 2; 25).

283 Allee effects, a common density-dependent process (18; 31), influence small pop-  
284 ulations by decreasing low-density vital rates (e.g., reproduction (51)). We find in  
285 all of our models that Allee effects, and the pushed invasions that they generate,  
286 are a necessary ingredient of fluctuating speeds. Interestingly, this result contrasts  
287 with Dwyer and Morris (7). Working with a two-species model, they found that fluc-  
288 tuating speeds can occur when predator dispersal distance depends on prey density  
289 (a type of density dependent movement) but without an explicit Allee effect. We  
290 conjecture that predator-prey dynamics in their model may in fact give rise to an  
291 implicit Allee effect, as is known to occur in other predator-prey models (33). Bio-  
292 logically, density-dependent movement can contribute to an Allee effect by reducing  
293 mate finding abilities at low densities, especially when the movement is sex biased  
294 (53; 41). In this way, the study by Dwyer and Morris (7), while superficially incon-  
295 sistent with ours, may nonetheless satisfy the conditions we identify as necessary for  
296 variable invasions.

297 Thoroughly accounting for the sources of variability in the speed of biological  
298 invasions may improve invasion forecasting. Our work suggests that intrinsic density  
299 dependence can create complex invasion dynamics, consistent with the highly variable  
300 spreading speeds seen in empirical invasion studies (34; 59; 60; 14; 4; 54). However,  
301 it remains an open question whether and how often these processes affect the ecologi-  
302 cal dynamics of spread, given the pervasive influences of environmental heterogeneity  
303 (43; 33; 57; 58; 3; 40) and demographic stochasticity (35; 17; 42), and their roles in  
304 invasion variability. To begin to answer this question, we suggest coupling models

305 and empirical data, which has proven to be a fruitful approach to understanding the  
306 intrinsic mechanisms behind fluctuations in local population density (e.g., (5; 48)).  
307 Collecting long-term data can be difficult, but some patterns might be straightforward  
308 to identify from existing datasets. In particular, the strong two-cycle speed fluctu-  
309 ations generated when invaders experience both Allee effects and density-dependent  
310 dispersal propensity would likely be detectable in data. Few empirical studies have  
311 tested for endogenous mechanisms of fluctuating invasion speeds, including studies  
312 for which variability in speed was an explicit focus (53; 27; 29; 34; 59) (but see (14)).  
313 Thus, signatures of endogenous variability may be embedded in existing data, and  
314 we encourage empiricists to re-examine variable invasion data in the context of these  
315 density-dependent mechanisms.

## 316 **Materials and Methods**

317 The models we studied are each a special case of equation (1). They all use the  
318 Laplace dispersal kernel with variance  $\sigma^2$ :

$$k(x - y; \sigma^2) = \frac{1}{\sqrt{2\sigma^2}} \exp \left[ -\sqrt{\frac{2(x - y)^2}{\sigma^2}} \right]. \quad (2)$$

319 Qualitative results are robust to kernel choice (i.e. Normal, Cauchy).

## 320 **Overcompensatory Model**

321 We combine low-density Allee effects with the possibility of overcompensation at high  
322 density (Fig. S1a):

$$f(n) = \begin{cases} n \exp(r(1 - n)) & \text{for } n > a, \\ 0 & \text{for } n \leq a. \end{cases} \quad (3)$$

323 Dispersal is independent of density in this model ( $\sigma^2(n) = \sigma^2$ , a constant) and all  
324 offspring disperse ( $p = 1$ ).

### 325 Propensity Model

326 Here, we used a linear-constant model for growth

$$f(n) = \begin{cases} \lambda n & \text{for } n < a \\ 1 & \text{for } n \geq a, \end{cases} \quad (4)$$

327 where  $0 \leq a < 1$  (Fig. S1b). Dispersal propensity depends upon the population  
328 density ( $n_t(x)$ ) via a logistic form similar to other models with density-dependent  
329 dispersal (Fig. S1c) (45):

$$p(n) = p_0 + \left\{ \frac{p_{max} - p_0}{1 + \exp[-\alpha(n - \hat{n})]} \right\}. \quad (5)$$

330 As in the overcompensatory model, the distance moved by dispersing individuals is  
331 independent of density ( $\sigma^2(n) = \sigma^2$ , a constant).

### 332 Distance Model

333 For this model, we use the reproduction function (4), but assume all offspring disperse  
334 ( $p = 1$ ) following a dispersal distribution whose variance is a logistic function of  
335 parental density ( $n_t(x)$ ) (Fig. S1d). I.e.,

$$\sigma^2(n) = \sigma_0^2 + \left\{ \frac{\sigma_{max}^2 - \sigma_0^2}{1 + \exp[-\beta(n - \hat{n})]} \right\}. \quad (6)$$

336 We simulated each model for 200 iterations across a domain of length 1200 with  
337  $2^{16} + 1$  spatial nodes. Within each simulation, we defined the location of the invasion  
338 front at each time step as the location where the density of the invasion wave first  
339 exceeded a density threshold of 0.05. We then used this location to calculate: (1)

340 the instantaneous invasion speed (i.e., the distance traveled by the front between  
341 consecutive time steps), (2) the mean invasion speed averaged over the last 50 time  
342 steps, and (3) the amplitude of invasion speed fluctuations (the difference between  
343 the maximum and minimum speed over the last 20 time steps). See Table S1 for a  
344 list of parameters and definitions. Code to run these models and recreate all figure  
345 will be available at Dryad upon manuscript acceptance.

## 346 **Acknowledgements**

347 LLS and AKS were supported by startup funds from the University of Minnesota  
348 (UMN) to AKS, BL by NSF DMS-1515875, TEXM by NSF DEB-1501814, and MGN  
349 by NSF DEB-1257545 and DEB-1145017. The initial idea was developed during the  
350 2014 ACKME Nantucket Mathematical Ecology retreat with input from participants  
351 and funding from WHOI Sea Grant. The manuscript was greatly improved by com-  
352 ments and support from E. Strombom, R. Williams, an anonymous editor, and two  
353 anonymous reviewers. The UMN Minnesota Supercomputing Institute (MSI) pro-  
354 vided resources that contributed to the research results reported within this paper.  
355 URL: <http://www.msi.umn.edu>.

## 356 **References**

- 357 [1] Andow, D. A., Kareiva, P. M., Levin, S. A., and Okubo, A. (1990). Spread of  
358 invading organisms. *Landsc Ecol*, 4(2-3):177–188.
- 359 [2] Andreassen, H. P. and Ims, R. A. (2001). Dispersal in patchy vole popula-  
360 tions: Role of patch configuration, density dependence, and demography. *Ecol*,  
361 82(10):2911–2926.
- 362 [3] Caswell, H., Neubert, M. G., and Hunter, C. M. (2011). Demography and dis-  
363 persal: invasion speeds and sensitivity analysis in periodic and stochastic environ-  
364 ments. *Theor Ecol*, 4(4):407–421.
- 365 [4] Chen, H. (2014). A spatiotemporal pattern analysis of historical mountain pine  
366 beetle outbreaks in British Columbia, Canada. *Ecography*, 37(4):344–356.
- 367 [5] Costantino, R. F., Desharnais, R. A., Cushing, J. M., and Dennis, B. (1997).  
368 Chaotic dynamics in an insect population. *Science*, 275(5298):389–391.
- 369 [6] Donohue, K. (1998). Maternal determinants of seed dispersal in *Cakile edentula*:  
370 Fruit, plant, and site traits. *Ecol*, 79(8):2771–2788.
- 371 [7] Dwyer, G. and Morris, W. F. (2006). Resource-dependent dispersal and the speed  
372 of biological invasions. *Am Nat*, 167(2):165–76.
- 373 [8] Fagan, W. F., Lewis, M. A., Neubert, M. G., and van den Driessche, P. (2002).  
374 Invasion theory and biological control. *Ecol Lett*, 5(1):148–157.
- 375 [9] Gandhi, S. R., Yurtsev, E. A., Korolev, K. S., and Gore, J. (2016). Range expan-  
376 sions transition from pulled to pushed waves as growth becomes more cooperative  
377 in an experimental microbial population. *Proc Natl Acad Sci USA*, 113(25):6922–  
378 6927.



- 379 [10] Gurney, W. S. C., Blythe, S. P., and Nisbet, R. M. (1980). Nicholson’s blowflies  
380 revisited. *Nature*, 287:17–21.
- 381 [11] Harrison, R. G. (1980). Dispersal polymorphisms in insects. *Annu Rev Ecol Syst*,  
382 11:95–118.
- 383 [12] Ims, R. A. and Andreassen, H. P. (2005). Density-dependent dispersal and spatial  
384 population dynamics. *Proc Roy Soc B*, 272(1566):913–918.
- 385 [13] Johnson, B. (1965). Wing polymorphism in aphids II. Interactions between  
386 aphids. *Entomologia Experimentalis et Applicata*, 8(1):49–64.
- 387 [14] Johnson, D. M., Liebhold, A. M., Tobin, P. C., and Bjørnstad, O. N. (2006).  
388 Allee effects and pulsed invasion by the gypsy moth. *Nature*, 444(7117):361–363.
- 389 [15] Kingsland, S. E. (1995). *Modeling nature*. University of Chicago Press.
- 390 [16] Kot, M., Lewis, M. A., and van den Driessche, P. (1996). Dispersal data and the  
391 spread of invading organisms. *Ecol*, 77(7):2027–2042.
- 392 [17] Kot, M., Medlock, J., Reluga, T., and Walton, D. B. (2004). Stochasticity,  
393 invasions, and branching random walks. *Theor Popul Biol*, 66(3):175–184.
- 394 [18] Kramer, A. M., Dennis, B., Liebhold, A. M., and Drake, J. M. (2009). The  
395 evidence for Allee effects. *Pop Ecol*, 51(3):341–354.
- 396 [19] Li, B., Lewis, M. A., and Weinberger, H. F. (2009). Existence of traveling  
397 waves for integral recursions with nonmonotone growth functions. *J Math Biol*,  
398 58(3):323–338.
- 399 [20] Lin, C., Lin, C., Lin, Y., and Mei, M. (2014). Exponential stability of non-  
400 monotone traveling waves for Nicholson’s blowflies equation. *SIAM J Math Anal*,  
401 46(2):1053–1084.

- 402 [21] Lui, R. (1983). Existence and stability of travelling wave solutions of a nonlinear  
403 integral operator. *J Math Biol*, 16(3):199–220.
- 404 [22] Lutscher, F. (2008). Density-dependent dispersal in integrodifference equations.  
405 *J Math Biol*, 56(4):499–524.
- 406 [23] Lutscher, F. and Van Minh, N. (2013). Traveling waves in discrete models  
407 of biological populations with sessile stages. *Nonlinear Anal: Real World Appl*,  
408 14(1):495–506.
- 409 [24] Marchetto, K. M., Jongejans, E., Shea, K., and Isard, S. A. (2010). Plant  
410 spatial arrangement affects projected invasion speeds of two invasive thistles. *Oikos*,  
411 119(9):1462–1468.
- 412 [25] Matthysen, E. (2005). Density-dependent dispersal in birds and mammals. *Ecog-*  
413 *raphy*, 28(3):403–416.
- 414 [26] May, R. M. (1974). Biological populations with nonoverlapping generations:  
415 Stable points, stable cycles, and chaos. *Science*, 186(4164):645–647.
- 416 [27] Melbourne, B. A. and Hastings, A. (2009). Highly variable spread rates in repli-  
417 cated biological invasions: Fundamental limits to predictability. *Science*, 325:1536–  
418 1539.
- 419 [28] Mendez, V., Llopis, I., Campos, D., and Horsthemke, W. (2011). Effect of  
420 environmental fluctuations on invasion fronts. *J Theor Biol*, 281(1):31–38.
- 421 [29] Miller, T. E. X. and Inouye, B. D. (2013). Sex and stochasticity affect range  
422 expansion of experimental invasions. *Ecol Lett*, 16:354–361.
- 423 [30] Miller, T. E. X. and Tenhumberg, B. (2010). Contributions of demography and  
424 dispersal parameters to the spatial spread of a stage-structured insect invasion.  
425 *Ecol Appl*, 20(3):620–633.

- 426 [31] Morris, D. W. (2002). Measuring the Allee effect: Positive density dependence  
427 in small mammals. *Ecol*, 83(1):14–20.
- 428 [32] Neubert, M. G. and Caswell, H. (2000). Demography and dispersal: Calcula-  
429 tion and sensitivity analysis of invasion speed for structured populations. *Ecol*,  
430 81(6):1613–1628.
- 431 [33] Neubert, M. G., Kot, M., and Lewis, M. A. (2000). Invasion speeds in fluctuating  
432 environments. *Proc Roy Soc B*, 267:1603–1610.
- 433 [34] Ochocki, B. M. and Miller, T. E. X. (2017). Rapid evolution of dispersal ability  
434 makes biological invasions faster and more variable. *Nat Commun*, 8:14315.
- 435 [35] Pachevsky, E. and Levine, J. M. (2011). Density dependence slows invader spread  
436 in fragmented landscapes. *Am Nat*, 177(1):18–28.
- 437 [36] Pardini, E. A., Drake, J. M., Chase, J. M., and Knight, T. M. (2009). Complex  
438 population dynamics and control of the invasive biennial *Alliaria petiolata* (garlic  
439 mustard). *Ecol Appl*, 19(2):387–397.
- 440 [37] Peltonen, M., Liebhold, A. M., Bjørnstad, O. N., and Williams, D. W. (2002).  
441 Spatial synchrony in forest insect outbreaks: Roles of regional stochasticity and  
442 dispersal. *Ecol*, 83(11):3120–3129.
- 443 [38] Robert F. Denno, G. K. R. (1992). Density-related dispersal in planthoppers:  
444 Effects of interspecific crowding. *Ecol*, 73(4):1323–1334.
- 445 [39] Sakai, A. K., Allendorf, F. W., Holt, J. S., Lodge, D. M., Molofsky, J., With,  
446 K. A., Baughman, S., Cabin, R. J., Cohen, J. E., Ellstrand, N. C., McCauley,  
447 D. E., O’Neil, P., Parker, I. M., Thompson, J. N., and Weller, S. G. (2001). The  
448 population biology of invasive species. *Annu Rev Ecol Syst*, 32:305–332.

- 449 [40] Schreiber, S. J. and Ryan, M. E. (2011). Invasion speeds for structured popula-  
450 tions in fluctuating environments. *Theor Ecol*, 4(4):423–434.
- 451 [41] Shaw, A. K., Kokko, H., and Neubert, M. G. (in press). Sex differences and Allee  
452 effects shape the dynamics of sex-structured invasions. *J Anim Ecol*.
- 453 [42] Shen, W. (2004). Traveling waves in diffusive random media. *J Dyn Diff Equ*,  
454 16(4):1011–1060.
- 455 [43] Shigesada, N., Kawasaki, K., and Teramoto, E. (1986). Traveling periodic waves  
456 in heterogeneous environments. *Theor Popul Biol*, 30:143–160.
- 457 [44] Skellam, J. G. (1951). Random dispersal in theoretical populations. *Biometrika*,  
458 38(1):196–218.
- 459 [45] Smith, M. J., Sherratt, J. A., and Lambin, X. (2008). The effects of density-  
460 dependent dispersal on the spatiotemporal dynamics of cyclic populations. *J Theor*  
461 *Biol*, 254(2):264–274.
- 462 [46] Solar, A. and Trofimchuk, S. (2015). Asymptotic convergence to pushed wave-  
463 fronts in a monostable equation with delayed reaction. *Nonlinearity*, 28(7):2027–  
464 2052.
- 465 [47] Taylor, C. M. and Hastings, A. (2005). Allee effects in biological invasions. *Ecol*  
466 *Lett*, 8:895–908.
- 467 [48] Turchin, P. (2003). *Complex population dynamics: A theoretical/empirical syn-*  
468 *thesis*. Princeton University Press.
- 469 [49] van den Bosch, F., Hengeveld, R., and Metz, J. A. J. (1992). Analysing the  
470 velocity of animal range expansion. *J of Biogeogr*, 19(2):135–150.
- 471 [50] van Saarloos, W. (2003). Front propagation into unstable states. *Physics Reports*,  
472 386:29–222.

- 473 [51] Veit, R. R. and Lewis, M. A. (1996). Dispersal, population growth, and the Allee  
474 Effect: Dynamics of the house finch invasion of eastern North America. *Am Nat*,  
475 148(2):255–274.
- 476 [52] Volkov, D. and Lui, R. (2007). Spreading speed and travelling wave solutions of  
477 a partially sedentary population. *IMA J Appl Math*, 72(6):801–816.
- 478 [53] Wagner, N. K., Ochocki, B. M., Crawford, K. M., Compagnoni, A., and Miller,  
479 T. E. (2016). Genetic mixture of multiple source populations accelerates invasive  
480 range expansion. *J Anim Ecol*, 86(1):21–34.
- 481 [54] Walter, J. A., Johnson, D. M., Tobin, P. C., and Haynes, K. J. (2015). Population  
482 cycles produce periodic range boundary pulses. *Ecography*, 38:1200–1211.
- 483 [55] Wang, M.-H., Kot, M., and Neubert, M. G. (2002). Integrodifference equations,  
484 Allee effects, and invasions. *J Math Biol*, 44:150–168.
- 485 [56] Weinberger, H. F. (1982). Long-time behavior of a class of biological models.  
486 *SIAM J Math Anal*, 13(3):353–396.
- 487 [57] Weinberger, H. F. (2002). On spreading speeds and traveling waves for growth  
488 and migration models in a periodic habitat. *J Math Biol*, 45(6):511–548.
- 489 [58] Weinberger, H. F., Kawasaki, K., and Shigesada, N. (2008). Spreading speeds  
490 of spatially periodic integrodifference models for populations with nonmonotone  
491 recruitment functions. *J Math Biol*, 57(3):387–411.
- 492 [59] Weiss-Lehman, C., Hufbauer, R. A., and Melbourne, B. A. (2017). Rapid trait  
493 evolution drives increased speed and variance in experimental range expansions.  
494 *Nat Commun*, 8:14303.

495 [60] Williams, J. L., Kendall, B. E., and Levine, J. M. (2016). Rapid evolution ac-  
496 celerates plant population spread in fragmented experimental landscapes. *Science*,  
497 353:482–485.

498 [61] Zipkin, E. F., Kraft, C. E., Cooch, E. G., and Sullivan, P. J. (2009). When can  
499 efforts to control nuisance and invasive species backfire? *Ecol Appl*, 19(6):1585–  
500 1595.

501 **Figures**

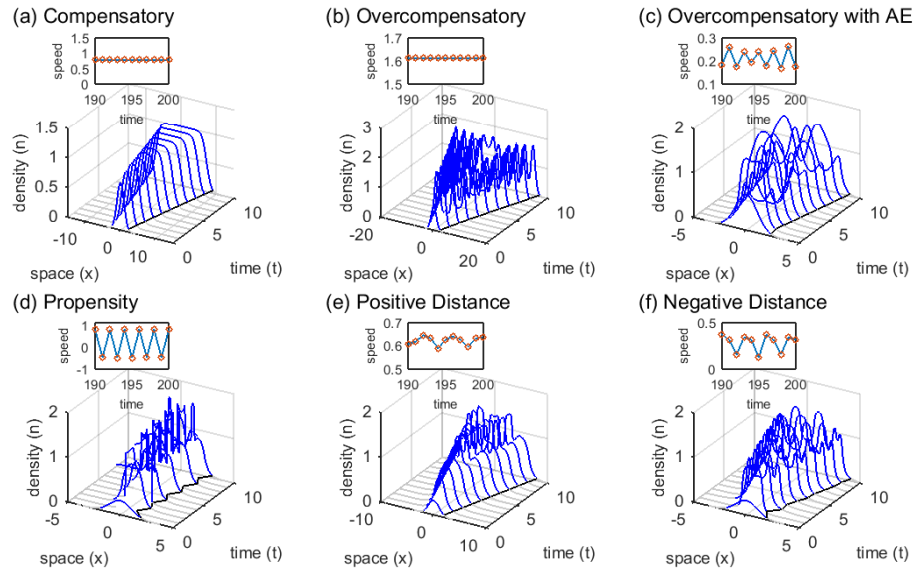

Figure 1: Invasion dynamics under different types of density dependence and dispersal. With compensatory growth at high densities (a), the wave shape and invasion speed are both constant. This is true with and without low-density Allee effects (overcompensatory model:  $\sigma^2 = 0.25$ ,  $a = 0$ , and  $r = 0.9$ ; Fig. S1a). With overcompensatory population growth and no Allee effect (b), population density exhibits fluctuations behind the front yet the leading edge progresses at a constant speed (overcompensatory model:  $\sigma^2 = 0.25$ ,  $a = 0$ , and  $r = 2.7$ ; Fig. S1a). However, when overcompensation combines with low-density Allee effects (c), the invasion speed fluctuates (overcompensatory model:  $\sigma^2 = 0.25$ ,  $a = 0.4$ , and  $r = 2.7$ ; Fig. S1a). Variability in invasion speed can also occur when Allee effects combine with density-dependence in the proportion of dispersing offspring (d) (propensity model:  $a = 0.2$ ,  $\lambda = 0$ ,  $\hat{n} = 0.9$ ,  $p_0 = 0.05$ ,  $p_{max} = 1$ ,  $\alpha = 50$ ), or in dispersal distance (e,f). In the latter model, dispersal distance decreases with population density (e) (distance model:  $a = 0.2$ ,  $\lambda = 0$ ,  $\hat{n} = 0.9$ ,  $\beta = -50$ ,  $\sigma_0^2 = 0.05$ ,  $\sigma_{max}^2 = 1$ ), or increases with density (f) (distance model: parameters as in (e) except  $\beta = 50$ ). Initial population densities are either 2 (a-c) or 0.8 (d-f) times the standard normal probability density truncated at  $|x| = 5$ .



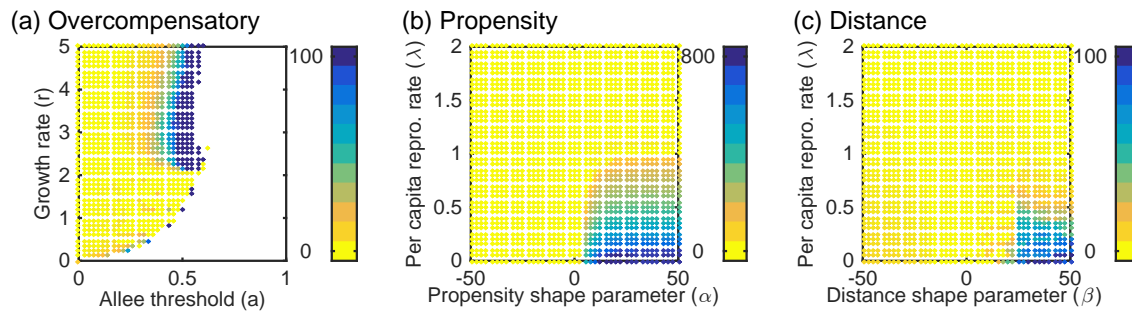

Figure 2: Amplitude of fluctuations in invasion speed normalized by the mean speed for populations with Allee effects and (a) overcompensatory growth, (b) density-dependent dispersal propensity, and (c) density-dependent dispersal distance. Darker colors (blue) indicate where fluctuations create large differences from the mean invasion speed. Values of zero (yellow) indicate invasion waves that move at a constant speed. White regions indicate where invasions fail. Parameter values:  $\sigma^2 = 0.25$  (a-b);  $a = 0.2$ ,  $\hat{n} = 0.9$  (b-c);  $p_0 = 0.05$ ,  $p_{max} = 1$  (b);  $\sigma_0^2 = 0.05$ ,  $\sigma_{max}^2 = 1$  (c); Initial population densities are equivalent to those in Fig. 1.

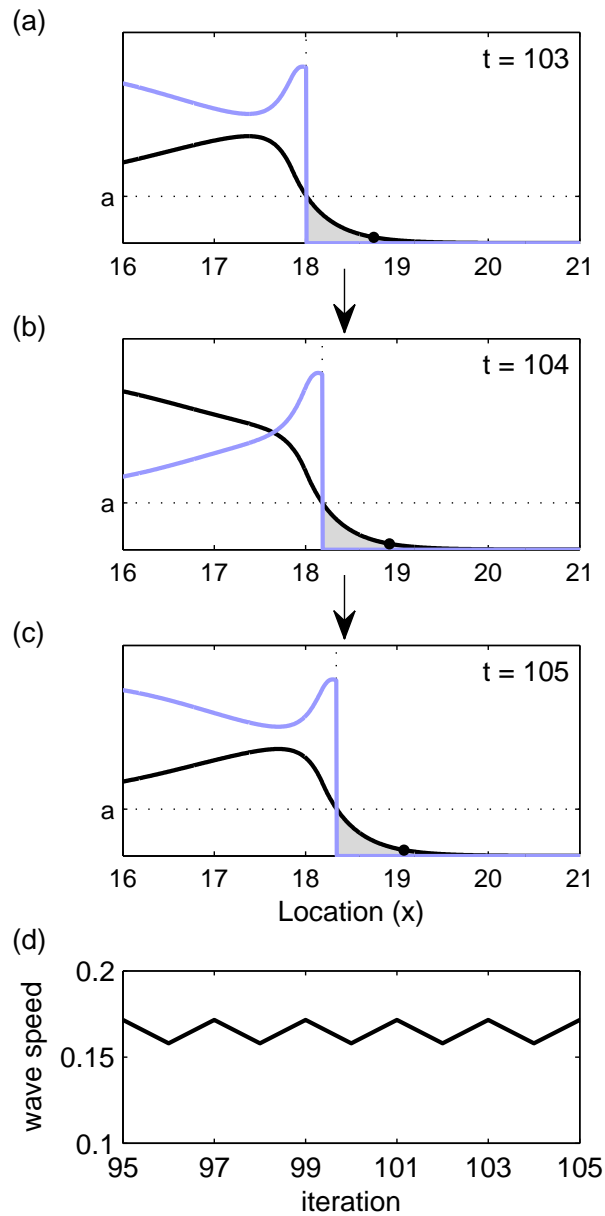

Figure 3: Population density before ( $n(x)$  - black curve) and after ( $f(n(x))$  - blue curve) growth (overcompensatory model with Allee effects, Eq. 3) at sequential time steps (a-c). Gray regions represent locations that go extinct due to Allee effects (light gray;  $n(x) < a$ ), and the solid point shows the edge of the wave. The wave speed over time (d), corresponds to (a-c). Parameter values include  $r = 2.2$ ,  $a = 0.4$ ,  $\sigma^2 = 0.25$ .

502 **Supporting Information (SI)**

503 **SI Table**

504

505

Table 1: All model parameters, definitions and corresponding models.

| <b>Variable</b>  | <b>Meaning</b>                                                            |
|------------------|---------------------------------------------------------------------------|
| $t$              | time                                                                      |
| $x, y$           | locations                                                                 |
| $n_t(x)$         | population density at location $x$ and time $t$                           |
| <b>Parameter</b> | <b>Meaning</b>                                                            |
| $a$              | Allee effect threshold                                                    |
| $r$              | intrinsic growth rate (overcompensatory model)                            |
| $\lambda$        | low-density per capita reproductive rate (propensity and distance models) |
| $\hat{n}$        | dispersal density midpoint parameter (propensity and distance models)     |
| $p$              | fraction of offspring that disperse                                       |
| $p_0$            | minimum dispersal propensity (propensity model)                           |
| $p_{max}$        | maximum dispersal propensity (propensity model)                           |
| $\alpha$         | propensity shape parameter (propensity model)                             |
| $\sigma^2$       | variance of the dispersal kernel                                          |
| $\sigma_0^2$     | minimum dispersal variance (distance model)                               |
| $\sigma_{max}^2$ | maximum dispersal variance (distance model)                               |
| $\beta$          | distance shape parameter (distance model)                                 |
| <b>Function</b>  | <b>Meaning</b>                                                            |
| $k(x - y)$       | dispersal kernel                                                          |
| $f(n_t(x))$      | growth or offspring density                                               |

506 **SI Figures**

507

508

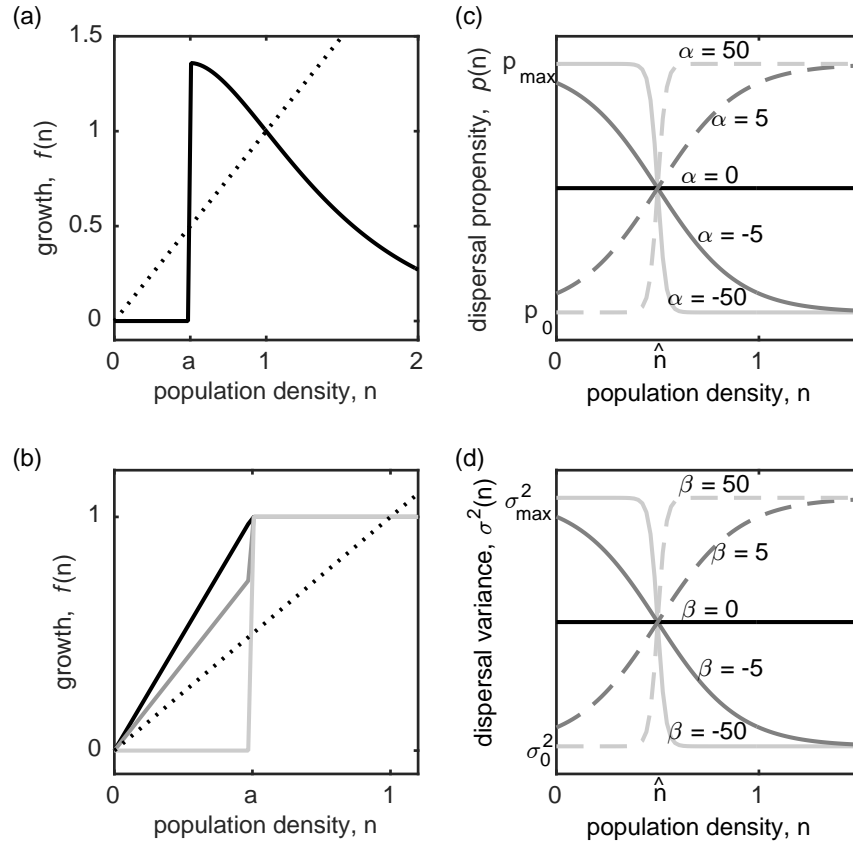

Figure S1: Reproduction and dispersal functions used in the overcompensatory, propensity, and distance models (described in Materials and Methods). (a) The reproductive rate  $f(n)$  as given by Eq. 3 where  $r = 0.9$  and  $a = 0$  (same parameterization as Eq. 3 for Fig 1a, black),  $r = 2.7$  and  $a = 0$  (same parameterization as Eq. 3 for Fig 1b, dark gray solid),  $r = 2.7$  and  $a = 0.4$  (same parameterization as Eq. 3 for Fig 1c, light gray dashed). (b) The reproductive rate  $f(n)$  as given by Eq. 4 when  $a = 0.5$  and  $\lambda = 0$  (light gray),  $\lambda = 1.5$  (dark gray),  $\lambda = 2$  (black). Parameterization here is close to that of Fig 1d-f, except  $a$  is smaller here to more clearly visually demonstrate the differences between strong, weak and no Allee effects. (c) The propensity to disperse when altered by density dependence as given by Eq. 5 for different  $\alpha$ . (d) The variance of the dispersal kernel when altered by density dependence Eq. 6 for different  $\beta$  values.

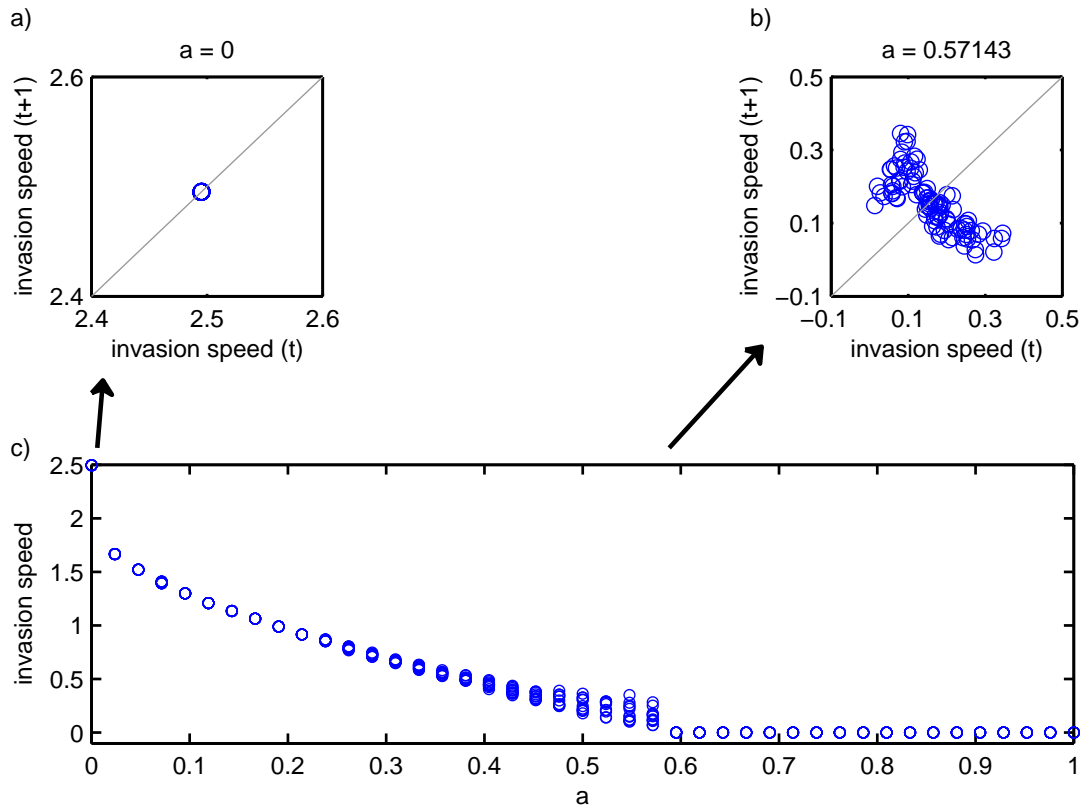

Figure S2: The periodicity of the invasion speed through time for the overcompensatory model - Allee effects and overcompensation. In panels a-b, the wave position is plotted at time  $t$  vs time  $t + 1$ . The wave speed ranges in periodicity across values of the Allee effect threshold  $a$ . At small values of  $a$  the invasion speed is constant (a), and at larger  $a$  values (b), the wave speed becomes chaotic until  $a$  becomes so large the population goes extinct. In panel (c), the range of invasion speeds represents the amplitude of fluctuations. At each plotted  $a$  value, the invasion speed for the previous 100 time steps are plotted. When points appear as hollow points, the same invasion speed is being plotted over itself many times. Here,  $\sigma^2 = 0.25$ .

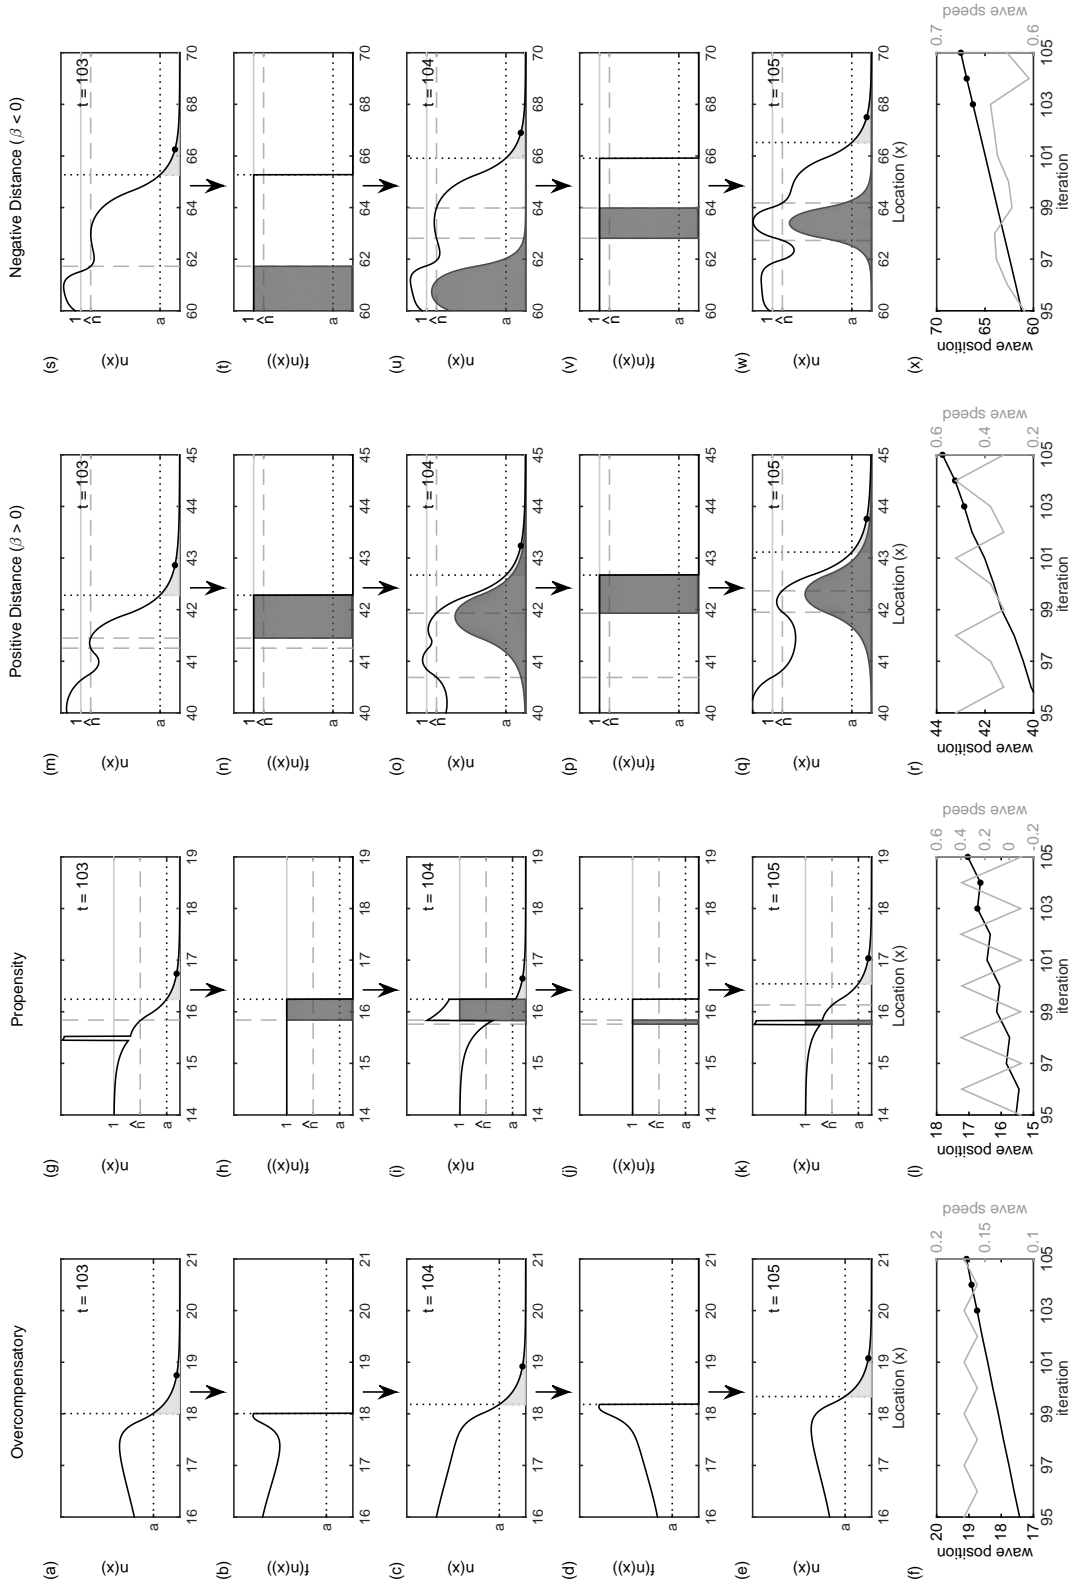

Figure S3: Four examples of fluctuations in invasion speed. The top five rows show the population density before ( $n(x)$ ) and after ( $f(n(x))$ ) growth at sequential time steps, showing individuals that will not reproduce (light gray;  $n < a$ ), those that do not disperse far (dark gray;  $n > \hat{n}$  or  $n < \hat{n}$ ), and the edge of the wave (solid point). The bottom row shows the wave position and speed over time. Parameter values and initial densities are the same as Fig. 2 except: (a-f)  $r = 2.2, a = 0.4, (g-l) \hat{n} = 0.6, \alpha \rightarrow \infty, (m-r) \beta \rightarrow \infty, (s-x) \beta \rightarrow -\infty$ .

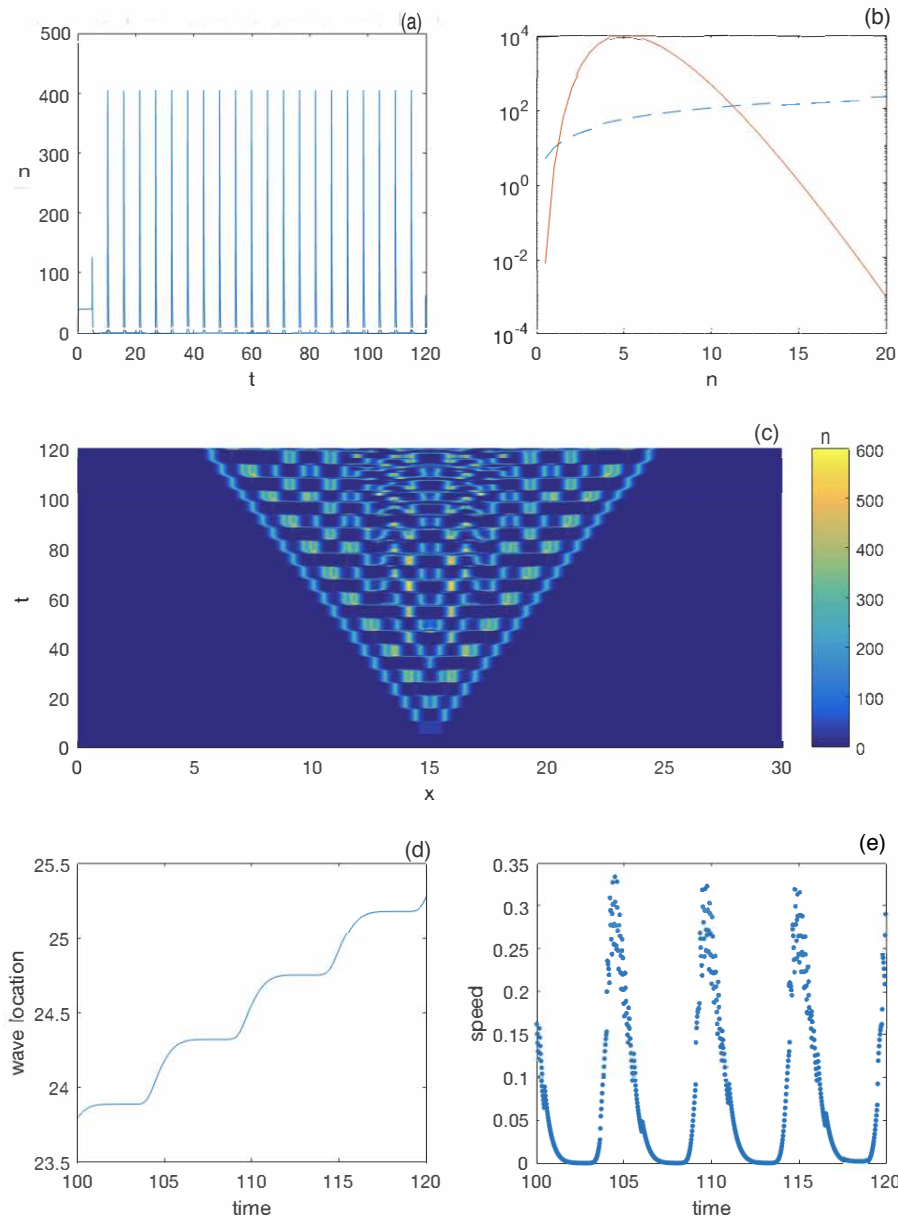

Figure S4: Simulation of model (Eq. 2 from SI Appendix), with  $a_1 = 20$ ,  $a_2 = 2$ ,  $a_3 = 10$ ,  $\mu = 10$ ,  $\tau = 5$ , and  $D = 0.1$ . For these parameters the *undelayed* ordinary differential equation (Eq. 2 from SI Appendix with  $D = 0$  and  $\tau = 0$ ) exhibits a strong Allee effect, evident by comparing the mortality rate (dashed blue line) to the reproduction rate (solid red curve) in panel (b) (note the logarithmic scale). With delays, the model without movement (Eq. 2 from SI Appendix with  $D = 0$ ) exhibits sharp generational cycles (a). The simulation of the partial functional differential equation (Eq. 2 from SI Appendix; initialized with  $n = 2$  for  $|x - 15| \leq 0.5$  and  $0 \leq t \leq \tau$ , and  $n = 0$  otherwise) exhibits complex dynamics behind the invading fronts (c). These oscillations push the wave forward with a variable speed (d,e).

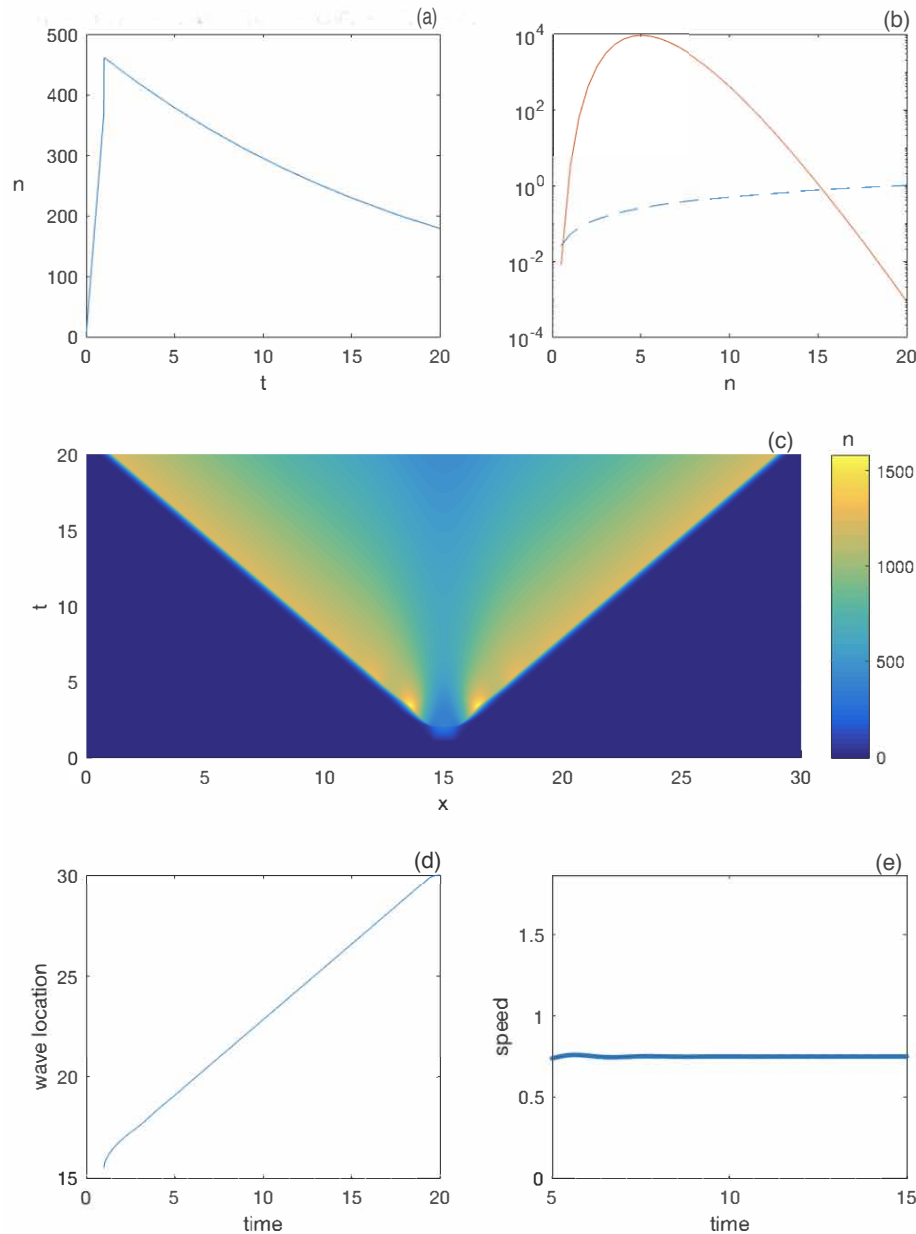

Figure S5: Simulation of model (Eq. 2 from SI Appendix), with  $a_1 = 20$ ,  $a_2 = 2$ ,  $a_3 = 10$ ,  $\mu = 0.05$ ,  $\tau = 1$ , and  $D = 0.1$ . For these parameters the *undelayed* ordinary differential equation (Eq. 2 from SI Appendix with  $D = 0$  and  $\tau = 0$ ) exhibits a strong Allee effect, evident by comparing the mortality rate (dashed blue line) to the reproduction rate (solid red curve) in panel (b) (note the logarithmic scale). With delays, the model without movement (Eq. 2 from SI Appendix with  $D = 0$ ) exhibits decay to a stable equilibrium (a). The simulation of the partial functional differential equation (Eq. 2 from SI Appendix; initialized with  $n = 2$  for  $|x - 15| \leq 0.5$  and  $0 \leq t \leq \tau$ , and  $n = 0$  otherwise) exhibits simple dynamics behind the invading fronts (c). High population densities behind the wave front push the invasion forward with a constant speed (d,e).



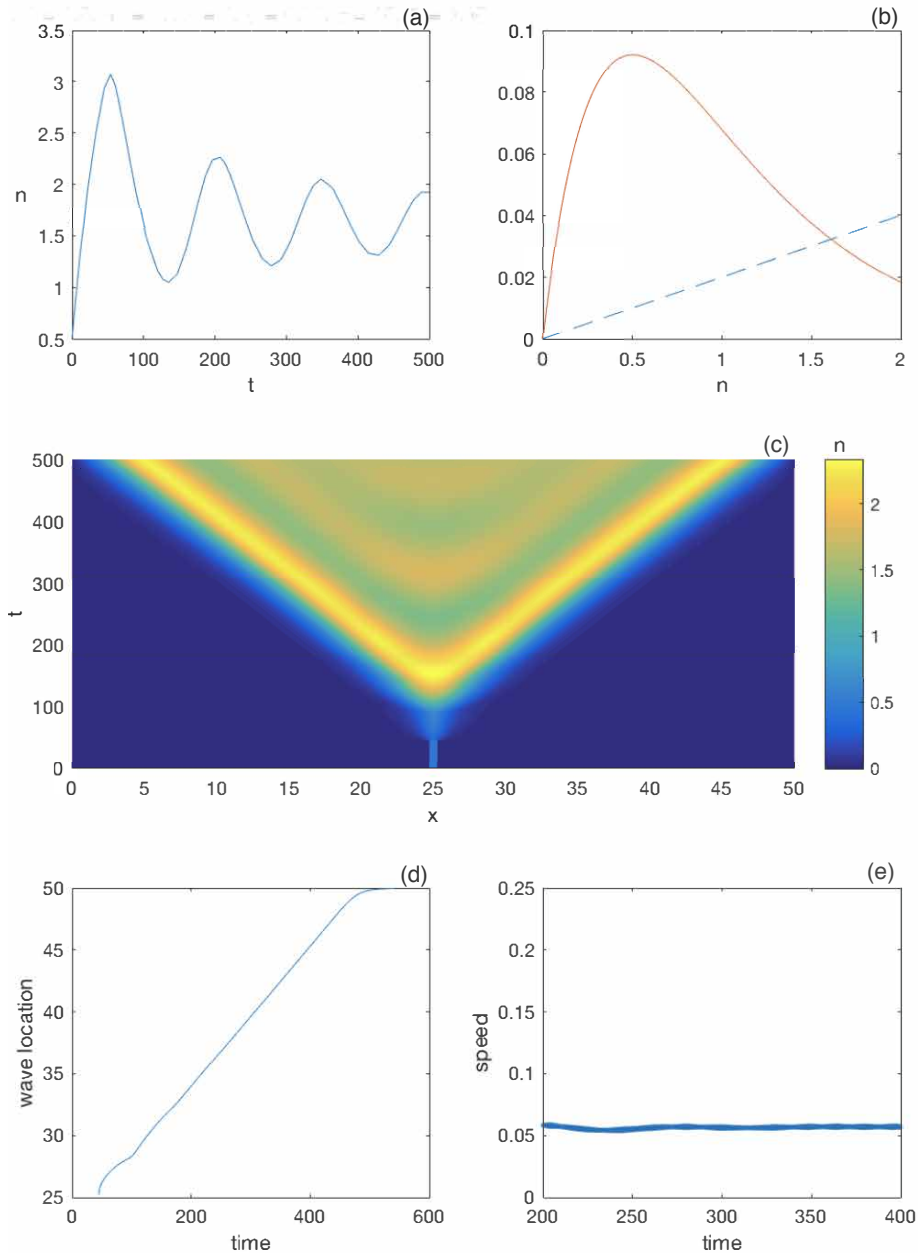

Figure S6: Simulation of model (Eq. 2 from SI Appendix) with  $a_1 = 0.5$ ,  $a_2 = 2$ ,  $a_3 = 1$ ,  $\mu = 0.02$ ,  $\tau = 45$ , and  $D = 0.05$ . For these parameters the *undelayed* ordinary differential equation (Eq. 2 from SI Appendix with  $D = 0$  and  $\tau = 0$ ) does not exhibit any Allee effect, evident by comparing the mortality rate (dashed blue line) to the reproduction rate (solid red curve) in panel (b) (note the arithmetic scale). With delays, the model without movement (Eq. 2 from SI Appendix with  $D = 0$ ) produces oscillations in population density (a). The simulation of the partial functional differential equation (Eq. 2 from SI Appendix; initialized with  $n = 0.5$  for  $|x - 25| \leq 0.5$  and  $0 \leq t \leq \tau$ , and  $n = 0$  otherwise) exhibits oscillatory dynamics behind the invading fronts (c); however, the wave is “pulled” by growth at low densities, so a constant invasion speed is achieved despite the fluctuations at high densities (d,e).

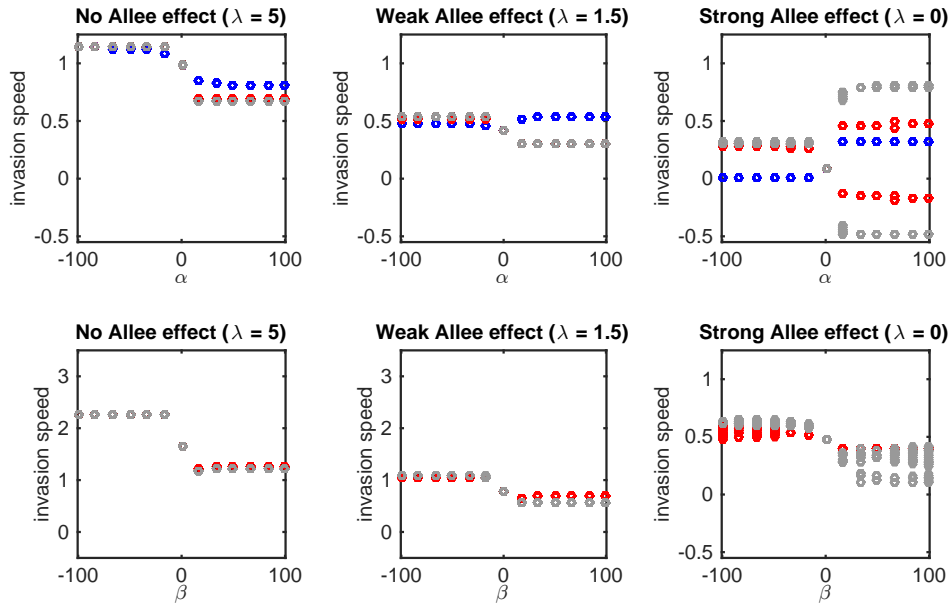

Figure S7: Bifurcation diagram indicating fluctuations in invasion speed across a range of Allee effect strength for the propensity Model – when density dependence alters dispersal propensity (a-c), and the distance model – when density dependence alters dispersal distance (d-f). Here, we also show a range of dispersal thresholds ( $\hat{n}$ ) relative to Allee effect threshold used for these models in the text ( $a = 0.2$ ), including  $\hat{n} = 0.1 < a$  (blue circles),  $\hat{n} = 0.7 > a$  (red circles), and  $\hat{n} = 0.9 \gg a$  (gray circles). All other parameters are the same as Fig. 2. Fluctuations in invasion speed only occur when Allee effects are strong, when the dispersal threshold is high, and when  $\alpha > 0$  (propensity model (a-c)) or across a range of positive and negative  $\beta$ 's (distance model (d-f)).

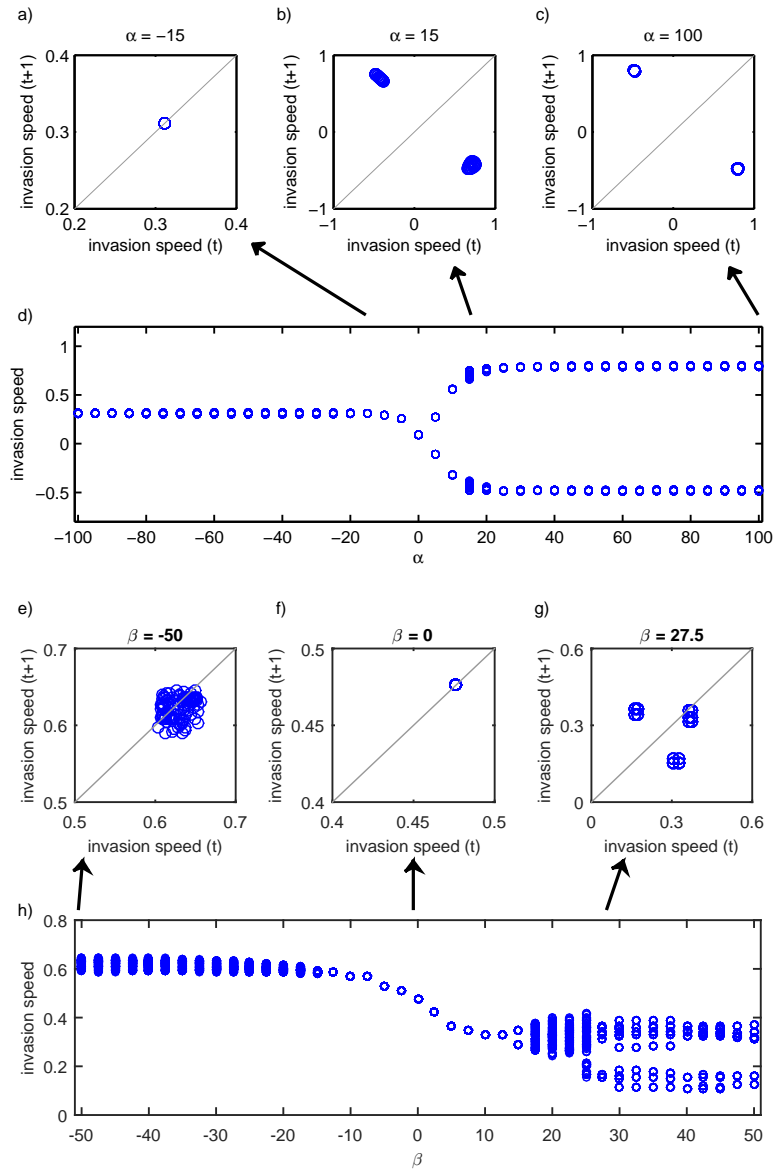

Figure S8: The periodicity of the invasion speed through time for the propensity model (Allee effects and density-dependent dispersal propensity; a-d) and distance model (Allee effects and density-dependent dispersal *distance*; e-h). In panels a-c and e-g, the wave position is plotted at time  $t$  vs time  $t + 1$ . In panels d and h, the range of invasion speeds represents the amplitude of fluctuations. For each parameter value, the invasion speed for the previous 100 time steps are plotted. When points appear as hollow points, the same invasion speed is being plotted over itself many times. For the propensity Model, when fluctuating, the wave speed is nearly always periodic across values of the Allee effect threshold  $a$ . At small values of  $\alpha$  the invasion speed is constant (a), at small positive  $\alpha$  the invasion speed fluctuates in a quasi-periodic fashion (b), and most positive  $\alpha$  values, for example  $\alpha = 100$  (c), the wave speed is periodic. Here,  $\hat{n} = 0.9$ ,  $\lambda = 0$ ,  $\sigma^2 = 0.25$ ,  $p_0 = 0.05$ ,  $p_{max} = 1$ , and  $a = 0.2$ . For the distance model, we demonstrate that the invasion speed appears to be more chaotic for some negative values of the density-dependent dispersal threshold ( $\beta$ ) (e), is constant for some values of  $\beta$  (f), and has a quasi-periodic attractor for some positive values of  $\beta$  (g). Here,  $\hat{n} = 0.9$ ,  $\lambda = 0$ ,  $\sigma_0^2 = 0.05$ ,  $\sigma_{max}^2 = 1$ , and  $a = 0.2$ .

## 509 SI Appendix

510

511

512 Here we construct a continuous-time model that we conjecture produces variable-  
513 speed invasions. We begin with a modification of a delay-differential equation model  
514 used by Gurney et al. (1) to study the dynamics of “Nicholson’s blowflies.”

$$\frac{dn}{dt} = -\mu n + a_1 n(t - \tau) e^{-a_2 n(t - \tau)}. \quad (7)$$

515 In this model,  $n$  is the population size of mature animals, and  $\tau$  is the maturation  
516 time. The change in the adult population size is due to constant per capita mortality  
517 (at rate  $\mu$ ) and recruitment of juveniles, born  $\tau$  time units ago, into the adult class.  
518 The per capita birth rate at low density ( $a_1$ ) is reduced (exponentially at the rate  $a_2$ )  
519 at larger population densities. This model produces large swings in adult population  
520 size when the maturation time is sufficiently large (1).

521 We modify the model (7) to include the potential for a strong Allee effect (when  
522 the parameter  $a_3 > 1$ ) and to include the random movement of adults via diffusion:

$$\frac{\partial n}{\partial t} = -\mu n(x, t) + a_1 [n(x, t - \tau)]^{a_3} e^{-a_2 n(x, t - \tau)} + D \frac{\partial^2 n(x, t)}{\partial x^2}. \quad (8)$$

523 Immature individuals are assumed to be sedentary.

524 The special case of model (8) with  $a_3 = 1$  (without Allee effects) has been thor-  
525 oughly studied (see, e.g., Lin et al. (2) and Solar and Trofimchuk (3) and references  
526 therein). The dynamics of this model in this case can be quite complex behind the  
527 leading invasion front, but, for biologically realistic initial conditions solutions, solu-  
528 tions exhibit an asymptotically constant spreading speed.

529 Much less is know about the dynamics of equation (8) when  $a_3 > 1$ , but the  
530 model would seem to have the features necessary to generate variable invasion speed.

531 Density-dependent reproduction, along with the maturation time delay, induce popu-  
532 lation fluctuations at high density, and the Allee effect should generate a pushed wave.  
533 Our numerical simulations suggest that this is indeed the case (Fig. S4). When, in  
534 contrast, the population dynamics converge to an equilibrium point behind the inva-  
535 sion front, the invasion speed is eventually constant, even in the presence of an Allee  
536 effect (Fig. S5). In the absence of Allee effects ( $a_3 = 1$ ), simulations of the model  
537 (8) produce constant speed invasions (Fig. S6), even if there are oscillatory dynamics  
538 behind the front, in agreement with prior theory.

## 539 **References**

- 540 [1] Gurney, W.S.C., Blythe, S. P. and Nisbet, R. M. 1980. Nicholson's blowflies re-  
541 visited. *Nature* **287**:17–21.
- 542 [2] Lin, C-K., Lin, C-T, Lin, Y, and Mei, M. 2014. Exponential stability of non-  
543 monotone traveling waves for Nicholson's blowflies equation. *SIAM Journal on*  
544 *Mathematical Analysis* **46**:1053–1084.
- 545 [3] Solar, A. and Trofimchuk, S. 2015. Asymptotic convergence to pushed wavefronts  
546 in a monostable equation with delayed reaction. *Nonlinearity* **28**:2027–2052.
